# Supplementary material
Source: HighWire-hosted journal article supplement (http://www.annfammed.org/highwire/filestream/8977/field_highwire_adjunct_files/0/Arenson_Supp.pdf)
Supplement: Arenson_Supp.pdf [file Arenson_Supp.pdf]

## Supplemental materials for:

Stoeckle J, Cunningham A, Arenson C. Scaling integrated behavioral health rapidly. *Ann Fam Med*. 2018;16(5):464.

**Key words:** behavioral health; primary care; organizational innovation

**Acknowledgments:** CPC+ is administered by the Center for Medicare & Medicaid Innovation (CMS Innovation Center). The CMS Innovation Center was created by the Affordable Care Act to test innovative payment and service delivery models that have the potential to reduce program expenditures while preserving or enhancing the quality of care. For more information about CPC+, visit: <https://innovation.cms.gov/initiatives/comprehensive-primary-care-plus/>

## References

1. Centers for Medicare and Medicaid. [internet] CPC+ Behavioral Health Integration Menu of Options (2017). <https://innovation.cms.gov/Files/x/cpcplus-bhinteg-options.pdf>.
2. Cherokee Health Systems . [internet]. Cherokee's Clinical Model. [https://www.cherokeehealth.com/Content/Uploads/cherokeehealth.com/images/Best%20Practices%202017\(1\).pdf](https://www.cherokeehealth.com/Content/Uploads/cherokeehealth.com/images/Best%20Practices%202017(1).pdf).
3. Kessler RS, Auxier A, Hitt JR, et al. Development and validation of a measure of primary care behavioral health integration. *Fam Syst Health*. 2016;34(4):342.
